# Supplementary material
Source: Springer Nature journal article supplement (https://www.springermedizin.de/resource/supplementary/12879_2012_1934_MOESM7_ESM.pdf/9443316)

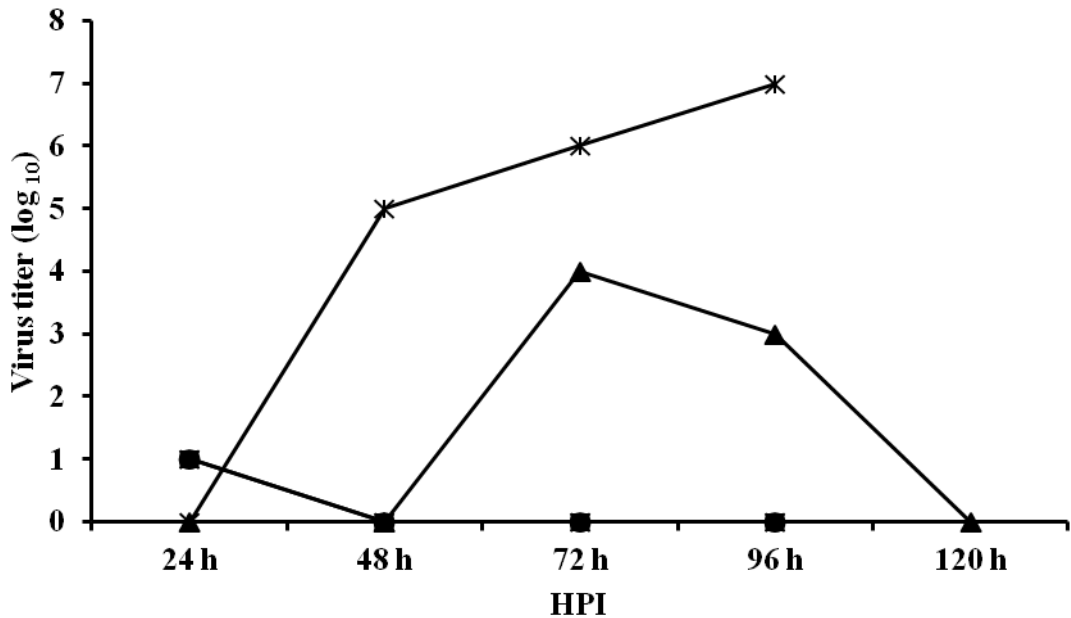

■ Blood (HeJ) ● Blood (CaJ) ▲ Brain (HeJ) \* Brain (CaJ)

Supplement: MOESM7 [file 9443316]
